# Supplementary material for: Synthesis and characterization of ammonium-based protic ionic liquids for carbon dioxide absorption
Source: Royal Society of Chemistry journal article supplement (doi:10.1039/d3ra01345f), 2023-01-01
Supplement: d3ra01345f1.pdf [file d3ra01345f1.pdf]

Supplementary data

$^1\text{H}$  NMR spectra of ammonium-based protic ionic liquids (APILs)

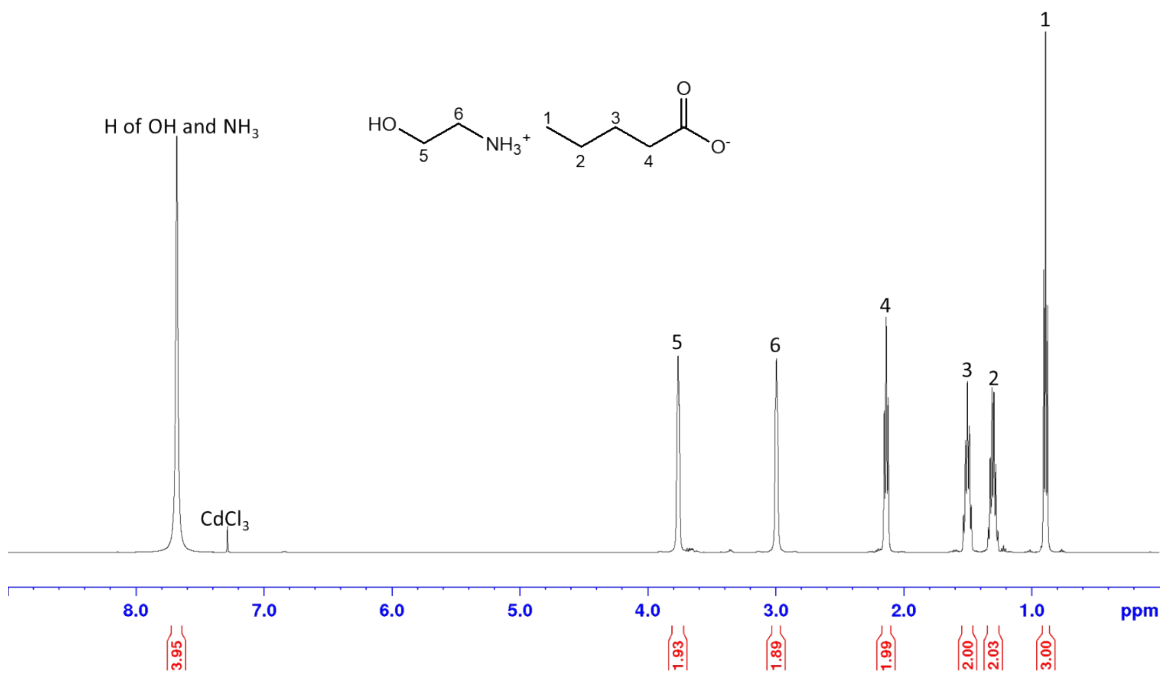

Figure S.1.  $^1\text{H}$  NMR spectrum [EtOHA][C5]

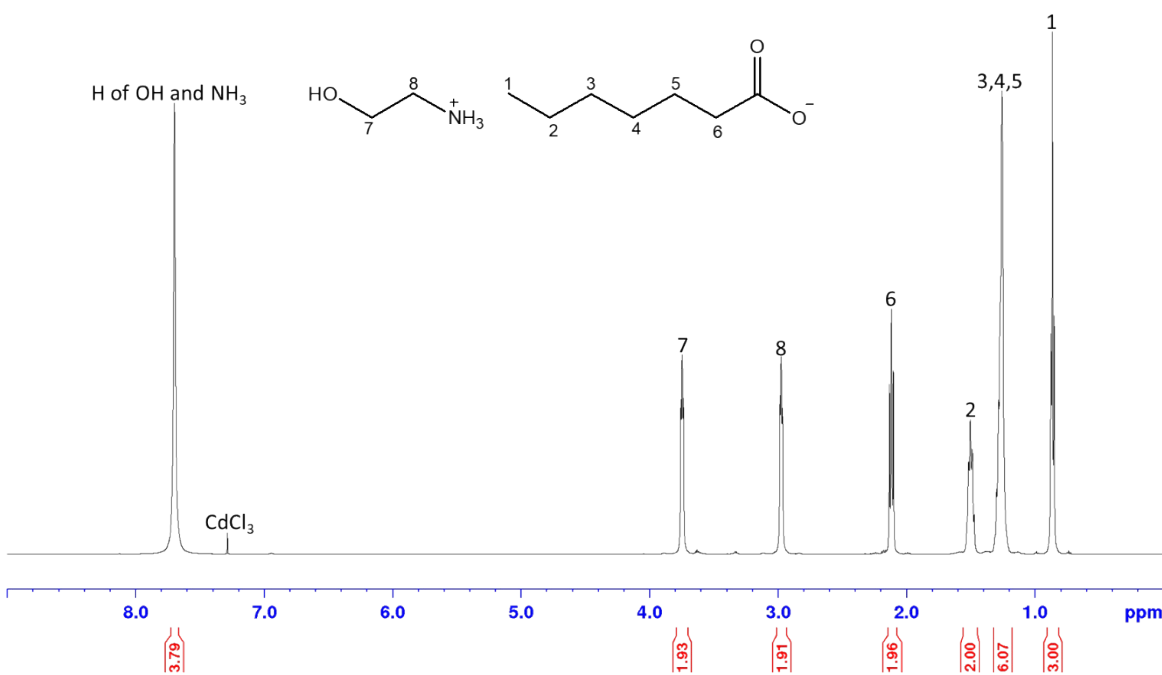

Figure S.2.  $^1\text{H}$  NMR spectrum [EtOHA][C7]

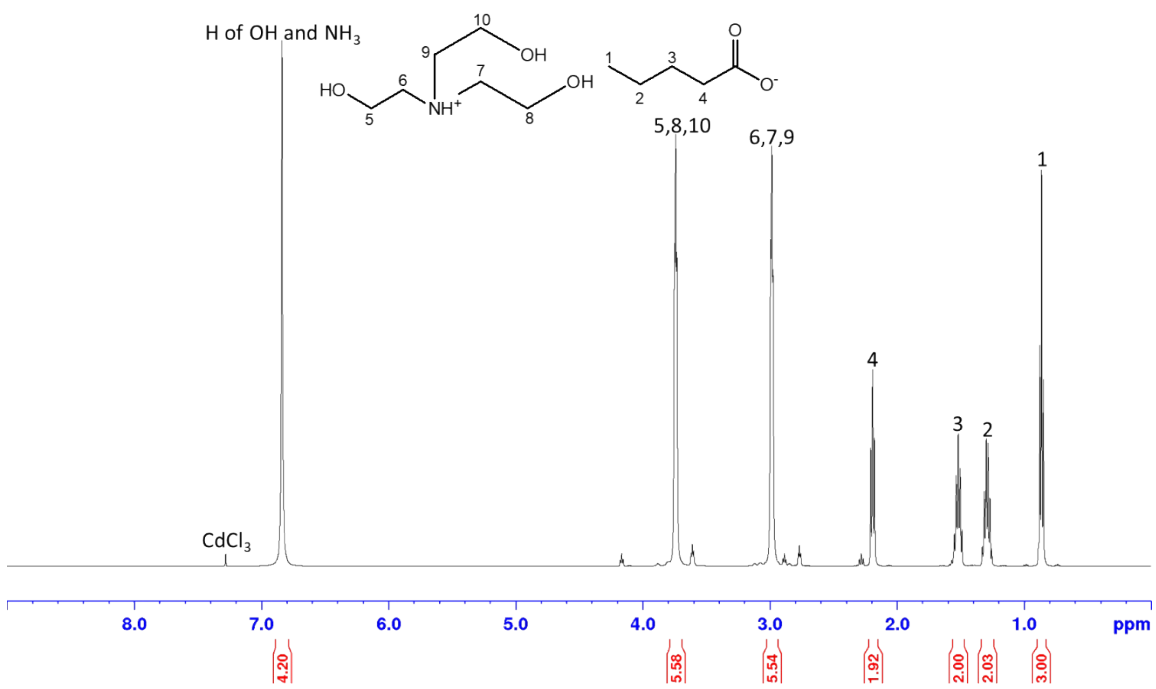

Figure S.3. <sup>1</sup>H NMR spectrum [TRIEOHA][C5]

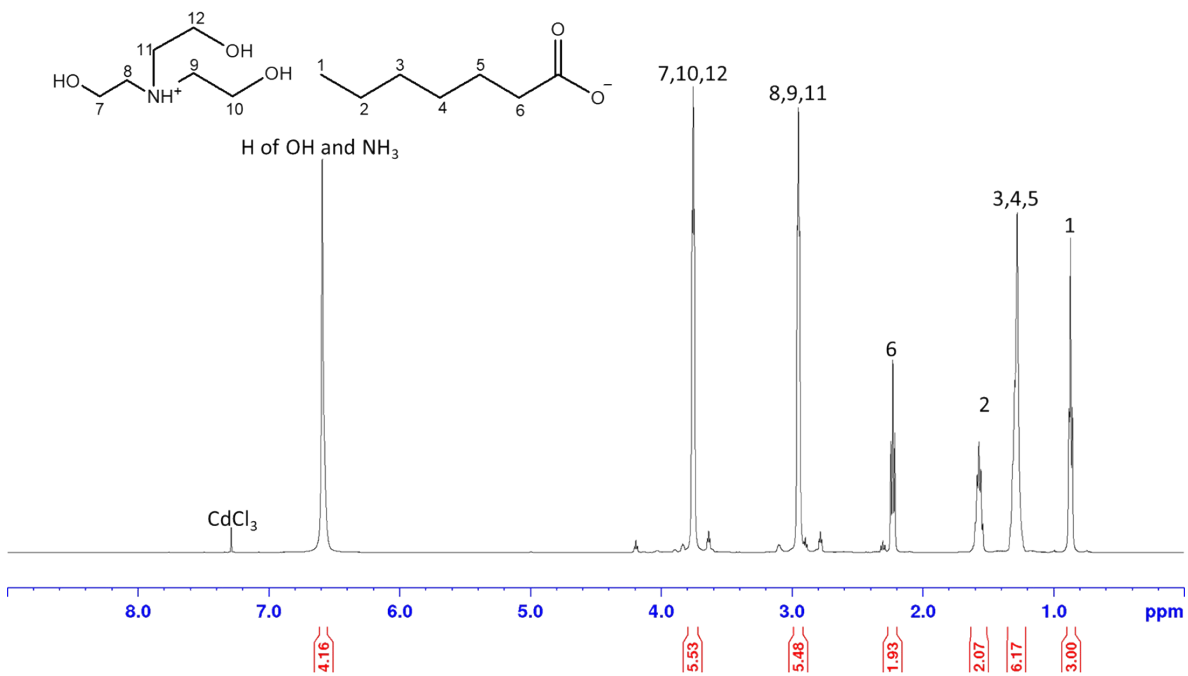

Figure S.4. <sup>1</sup>H NMR spectrum [TRIEOHA][C7]

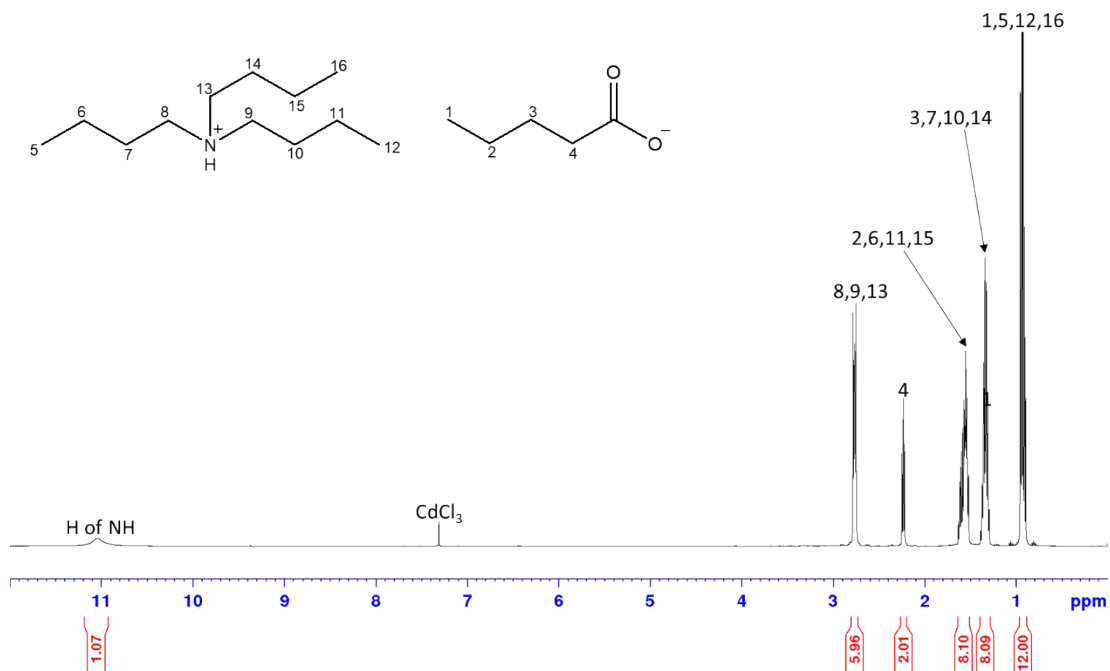

Figure S.5.  $^1\text{H}$  NMR spectrum [TBA][C5]

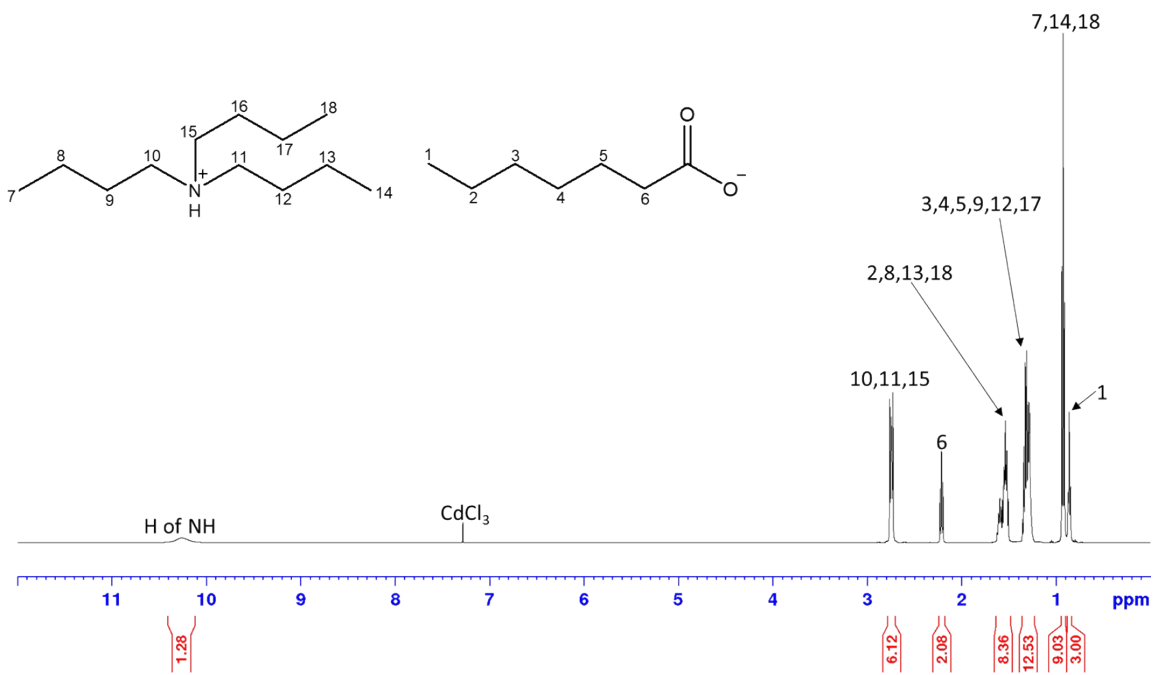

Figure S.6.  $^1\text{H}$  NMR spectrum [TBA][C7]

Table S1. Density of APIs at 293.15 -333.15 K

| Temperature<br>(K) | Density (gcm <sup>-3</sup> ) |             |                |                |           |           |
|--------------------|------------------------------|-------------|----------------|----------------|-----------|-----------|
|                    | [ETOHA][C5]                  | [ETOHA][C7] | [TRietoHA][C5] | [TRietoHA][C7] | [TBA][C5] | [TBA][C7] |
| 293.15             | 1.0380                       | 1.0063      | 1.0920         | 1.0544         | 0.8607    | 0.8434    |
| 296.15             | 1.0364                       | 1.0040      | 1.0896         | 1.0528         | 0.8582    | 0.8399    |
| 298.15             | 1.0346                       | 1.0024      | 1.0871         | 1.0509         | 0.8564    | 0.8389    |
| 300.15             | 1.0330                       | 1.0003      | 1.0851         | 1.0497         | 0.8554    | 0.8379    |
| 303.15             | 1.0314                       | 0.9986      | 1.0836         | 1.0486         | 0.8544    | 0.8362    |
| 306.15             | 1.0295                       | 0.9972      | 1.0818         | 1.0470         | 0.8530    | 0.8343    |
| 308.15             | 1.0278                       | 0.9959      | 1.0789         | 1.0451         | 0.8517    | 0.8328    |
| 313.15             | 1.0256                       | 0.9938      | 1.0754         | 1.0419         | 0.8488    | 0.8295    |
| 323.15             | 1.0191                       | 0.9876      | 1.0678         | 1.0383         | 0.8418    | 0.8232    |
| 333.15             | 1.0137                       | 0.9824      | 1.0624         | 1.0289         | 0.8345    | 0.8156    |

Table S2. Refractive index of APIs at 293.15 -333.15 K

| Temperature<br>(K) | Refractive index |             |                |                |           |           |
|--------------------|------------------|-------------|----------------|----------------|-----------|-----------|
|                    | [ETOHA][C5]      | [ETOHA][C7] | [TRietoHA][C5] | [TRietoHA][C7] | [TBA][C5] | [TBA][C7] |
| 293.15             | 1.4632           | 1.4566      | 1.4739         | 1.4722         | 1.4371    | 1.4394    |
| 296.15             | 1.4625           | 1.4558      | 1.4731         | 1.4715         | 1.4358    | 1.4382    |
| 298.15             | 1.4620           | 1.4552      | 1.4725         | 1.4709         | 1.4350    | 1.4374    |
| 300.15             | 1.4614           | 1.4546      | 1.4718         | 1.4702         | 1.4341    | 1.4365    |
| 303.15             | 1.4606           | 1.4538      | 1.4709         | 1.4692         | 1.4329    | 1.4353    |
| 306.15             | 1.4597           | 1.4528      | 1.4698         | 1.4681         | 1.4316    | 1.4340    |
| 308.15             | 1.4592           | 1.4522      | 1.4691         | 1.4675         | 1.4307    | 1.4332    |
| 313.15             | 1.4577           | 1.4508      | 1.4674         | 1.4657         | 1.4286    | 1.4310    |
| 323.15             | 1.4549           | 1.4477      | 1.4640         | 1.4622         | 1.4244    | 1.4267    |
| 333.15             | 1.4519           | 1.4445      | 1.4605         | 1.4585         | 1.4199    | 1.4226    |

Table S3. Dynamic viscosity of APIs at 293.15 -333.15 K

| Temperature<br>(K) | Dynamic viscosity (mPa.s) |             |                |                |           |           |
|--------------------|---------------------------|-------------|----------------|----------------|-----------|-----------|
|                    | [ETOHA][C5]               | [ETOHA][C7] | [TRietoHA][C5] | [TRietoHA][C7] | [TBA][C5] | [TBA][C7] |
| 293.15             | 1379.63                   | 279.40      | 804.79         | 848.81         | 10.03     | 11.52     |
| 298.15             | 991.30                    | 208.67      | 585.92         | 596.88         | 8.01      | 9.32      |
| 303.15             | 745.70                    | 152.46      | 405.27         | 417.34         | 6.73      | 7.80      |
| 308.15             | 539.76                    | 123.16      | 276.19         | 299.94         | 5.63      | 6.53      |
| 313.15             | 391.78                    | 90.77       | 197.86         | 213.59         | 5.03      | 5.52      |
| 323.15             | 222.51                    | 62.39       | 112.12         | 122.52         | 3.68      | 4.14      |
| 333.15             | 134.15                    | 42.57       | 65.87          | 72.02          | 2.92      | 3.29      |

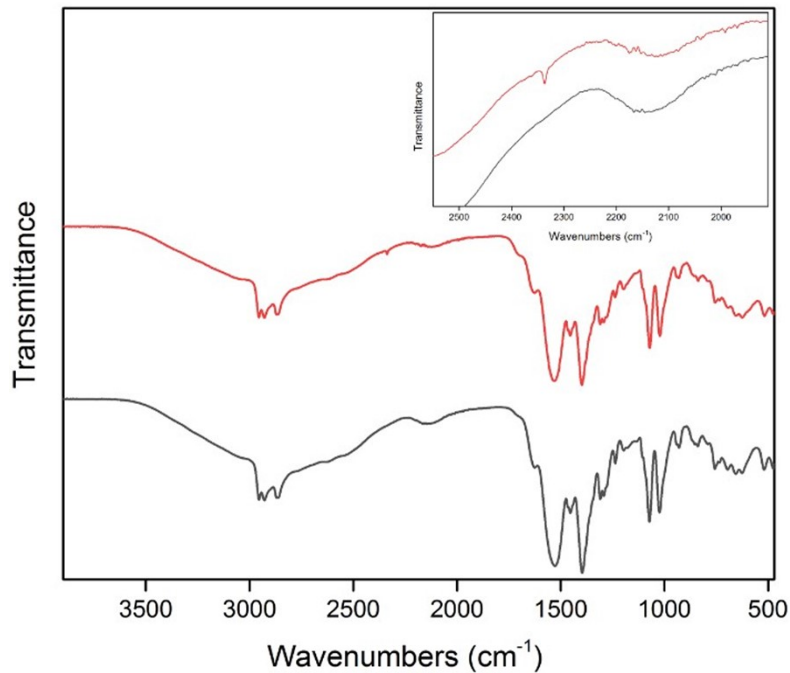

Figure S.7. FTIR spectra of [ETOHA][C5], before and after CO<sub>2</sub> absorption. (-) Black and (-) red denote before and after absorption, respectively. Inset figure shows the wavenumbers in the region approximately 2300 cm<sup>-1</sup> to highlight the presence of CO<sub>2</sub> in [ETOHA][C5]

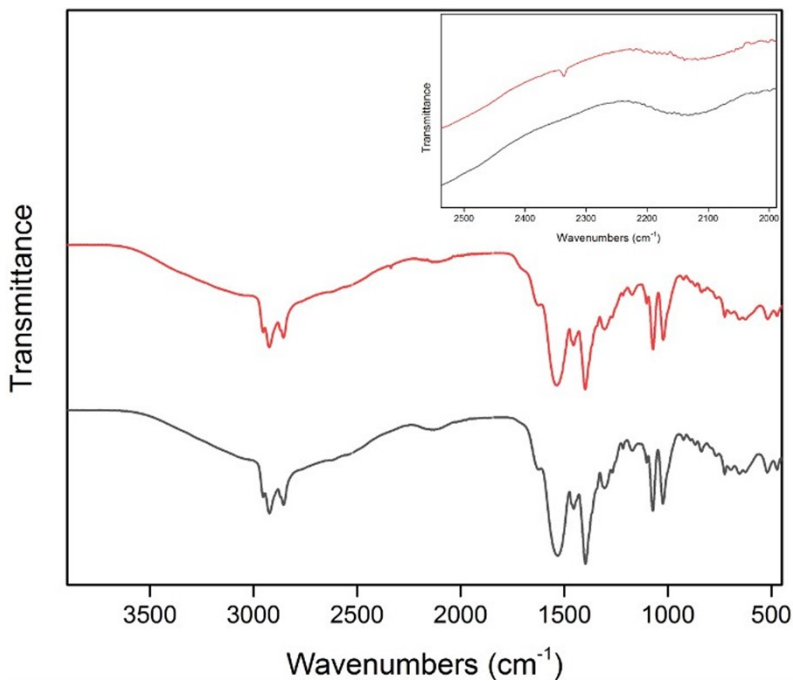

Figure S.8. FTIR spectra of [ETOHA][C7], before and after CO<sub>2</sub> absorption. (-) Black and (-) red denote before and after absorption, respectively. Inset figure shows the wavenumbers in the region approximately 2300 cm<sup>-1</sup> to highlight the presence of CO<sub>2</sub> in [ETOHA][C7]

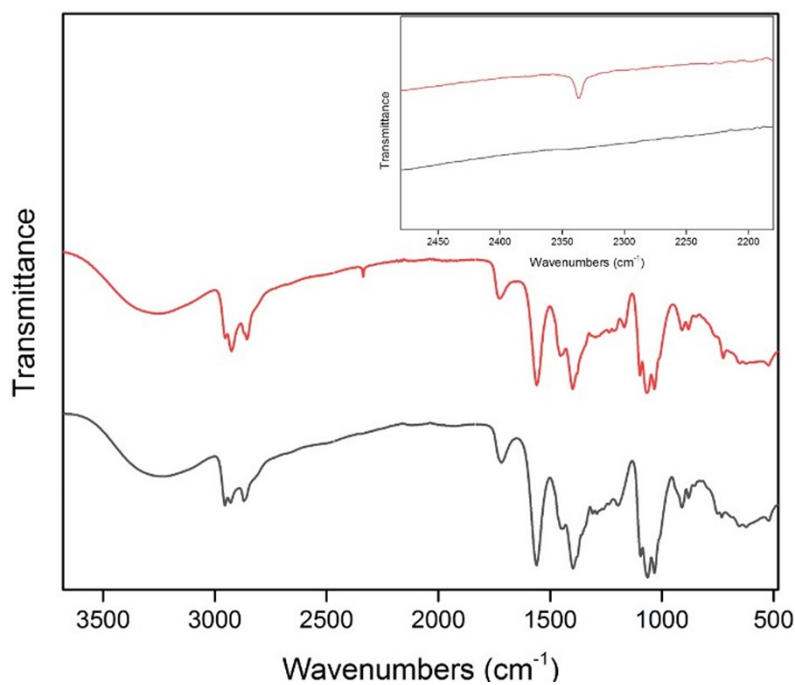

Figure S.9. FTIR spectra of [TRietoHA][C5], before and after CO<sub>2</sub> absorption. (-) Black and (-) red denote before and after absorption, respectively. Inset figure shows the wavenumbers in the region approximately 2300 cm<sup>-1</sup> to highlight the presence of CO<sub>2</sub> in [TRietoHA][C5]

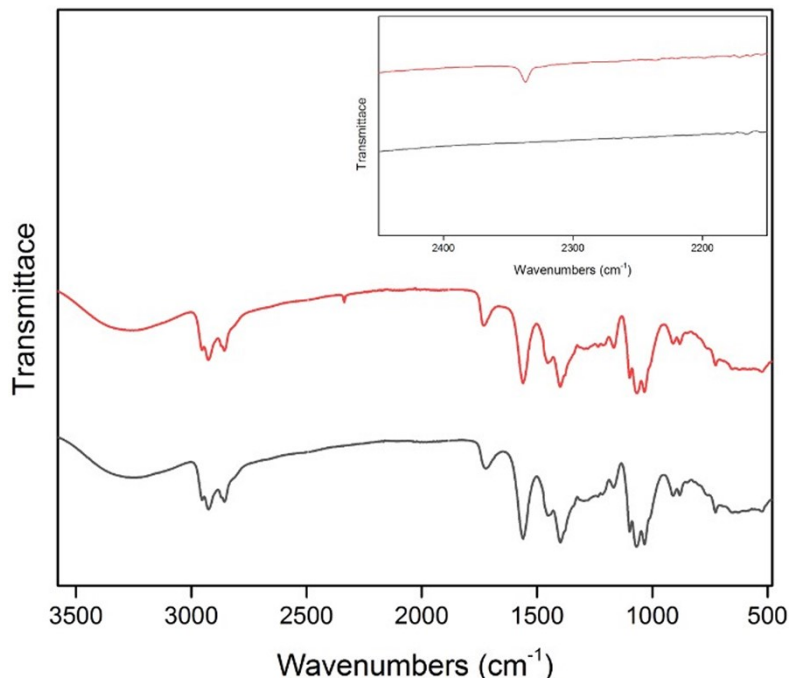

Figure S.10. FTIR spectra of [TRietoHA][C7], before and after CO<sub>2</sub> absorption. (-) Black and (-) red denote before and after absorption, respectively. Inset figure shows the wavenumbers in the region approximately 2300 cm<sup>-1</sup> to highlight the presence of CO<sub>2</sub> in [TRietoHA][C7]

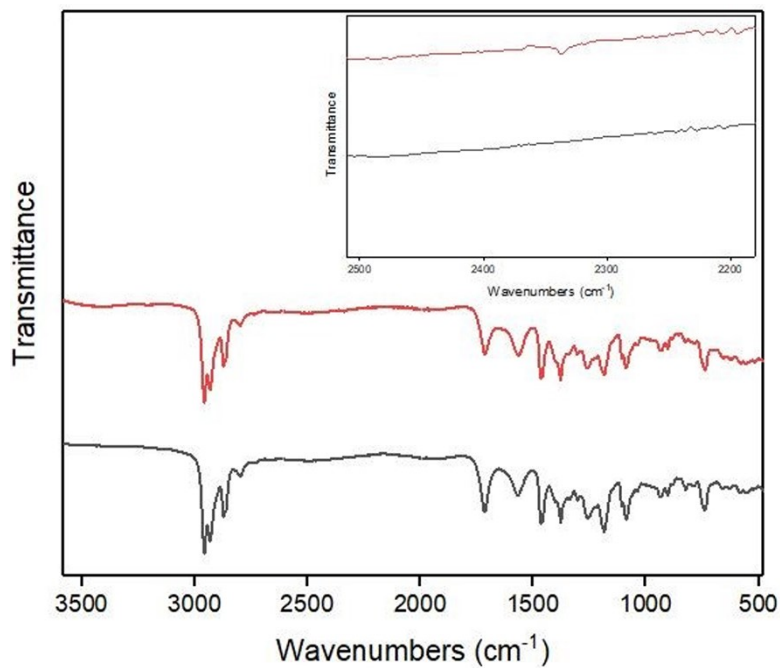

Figure S.11. FTIR spectra of [TBA][C5], before and after CO<sub>2</sub> absorption. (-) Black and (-) red denote before and after absorption, respectively. Inset figure shows the wavenumbers in the region approximately 2300 cm<sup>-1</sup> to highlight the presence of CO<sub>2</sub> in [TBA][C5]
